# Supplementary material
Source: PubMed Central journal article supplement (PMC6980756)
Supplement: NIHMS1542145-supplement-1.pdf [file NIHMS1542145-supplement-1.pdf]

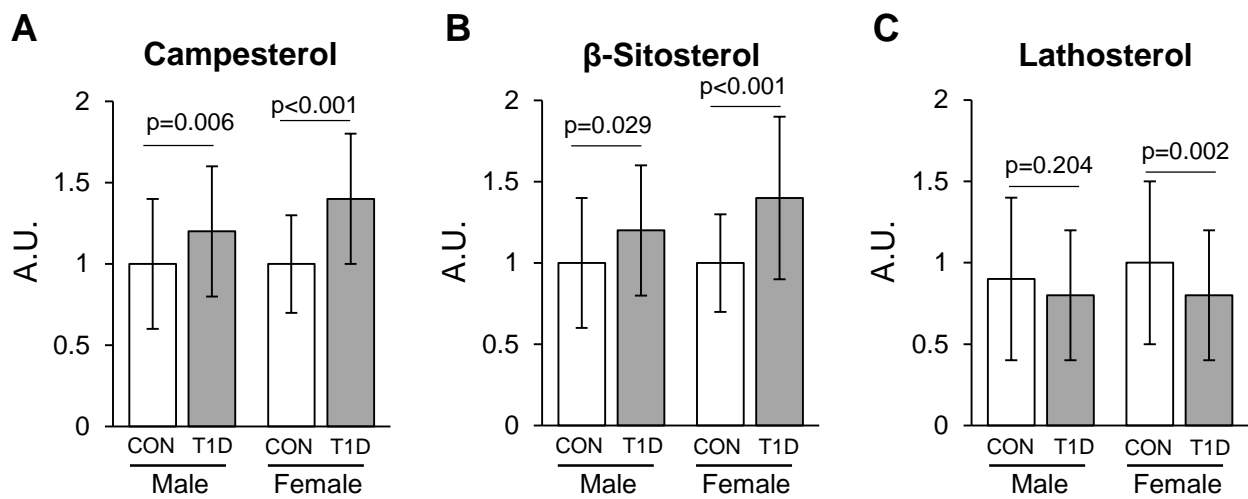

**Supplemental Figure 1.** Abundances of markers of cholesterol absorption (**A**, **B**) and synthesis (**C**) in T1D and non-diabetic control subjects, stratified by sex. Values are presented as Mean  $\pm$  SD; \*p-value based on t-test. CON, control; A.U., arbitrary units.
